# Supplementary material for: Mode-locking operation of an Er-doped fiber laser with (PEA)2(CsPbBr3)n−1PbBr4 perovskite saturable absorbers
Source: Royal Society of Chemistry journal article supplement (doi:10.1039/d2tc00635a), 2022-01-01
Supplement: d2tc00635a1.pdf [file d2tc00635a1.pdf]

Supporting Information

**Mode-locking operation of Er-doped fiber laser with  
(PEA)<sub>2</sub>(CsPbBr<sub>3</sub>)<sub>n-1</sub>PbBr<sub>4</sub> perovskite saturable absorber**

**SONG YANG,<sup>1,†</sup> JINGZHEN LI,<sup>2,†</sup> LI LI,<sup>3</sup> LING ZHANG,<sup>2,\*</sup> AND XINGWANG  
ZHANG<sup>2,\*</sup>**

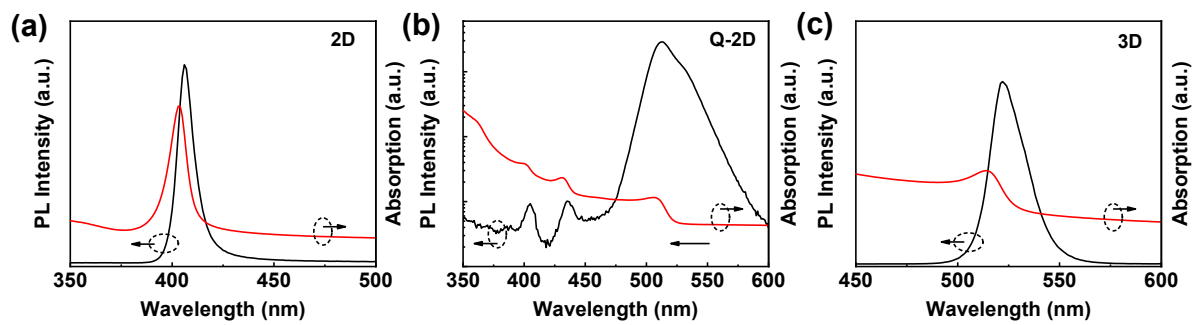

**Figure S1.** PL and absorption spectra of (a) 2D, (b) quasi-2D and (c) 3D perovskite.

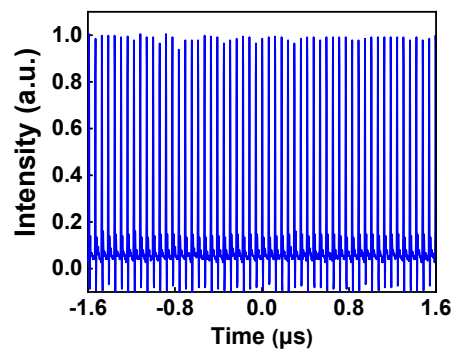

**Figure S2.** Pulse train with 3.2  $\mu\text{s}$  x-axis span.

**Table S1.** The precursor solution preparation for 2D, quasi-2D and 3D perovskite. An excess of CsBr (molar ratio of CsBr:PbBr<sub>2</sub>=2:1) was introduced to suppress the formation of non-CsPbBr<sub>3</sub> phases. PEABr is phenylethylammonium bromide.

| perovskite        | PEABr (/mL)           | PbBr <sub>2</sub> (/mL) | CsBr (/mL)             |
|-------------------|-----------------------|-------------------------|------------------------|
| 2D                | 0.2 mmol<br>(40.4 mg) | 0.1 mmol<br>(36.7 mg)   | 0                      |
| Quasi-2D<br>(n=5) | 0.2 mmol<br>(40.4 mg) | 0.5 mmol<br>(183.5 mg)  | 0.8 mmol<br>(170.2 mg) |
| 3D                | 0                     | 0.5 mmol<br>(183.5 mg)  | 1.0 mmol<br>(212.8 mg) |
